# Supplementary material
Source: Elsevier journal article supplement (https://www.sciencedirect.com/science/article/pii/S1130147319300260)
Supplement: mmc1 [file S1130147319300260:mmc1.pdf]

## Anexo. Material suplementario

### ÍNDICE DE HELKIMO (MODIFICADO POR MAGLIONE)

El Índice de Helkimo, consta de los siguientes criterios para su evaluación:

#### **A) LIMITACIÓN EN EL RANGO DEL MOVIMIENTO MANDIBULAR**

**Abertura máxima:** Se determina mediante regla milimetrada, colocada desde el borde incisal superior hasta el incisal inferior en la línea media, sin forzar la apertura según criterio de Maglione, quien señaló:

- 40 mm o más: sin limitación o apertura normal (0 punto).
- 30 a 39 mm: limitación leve (1 punto)
- Menos de 30mm: limitación severa (5 puntos)

**Máximo deslizamiento a la derecha:** Se considera la medición a partir del deslizamiento que efectúa la mandíbula desde la posición de máxima intercuspidad; se toma como punto de referencia la línea interincisiva cuando esta coincide, o la línea incisiva superior en caso de desviaciones de la línea media (esta se determinó a partir de la posición de reposo). Se contemplan:

- 7 mm o más: deslizamiento normal (0 punto)
- 4 a 6 mm: limitación leve del deslizamiento (1 punto)
- 0 a 3 mm: limitación severa del deslizamiento (5 puntos)

**Máximo deslizamiento a la izquierda:** Similares consideraciones que en punto anterior.

**Máxima protrusiva:** Se determina mediante regla milimetrada, colocada desde el borde incisal superior hasta el inferior en la línea media, cuando el maxilar inferior realiza el movimiento propulsivo hacia adelante.

- 7 mm o más: movimiento propulsivo normal (0 punto).
- 4 – 6 mm: limitación leve del movimiento propulsivo (1 punto).
- 0 – 3 mm: limitación severa del movimiento propulsivo (5 puntos).

## ÍNDICE DE MOVIMIENTO

Se toma partiendo de la suma de la puntuación obtenida según el rango del movimiento efectuado, de donde se considera:

- Movilidad normal: 0 punto
- Moderado deterioro de la movilidad: 1 - 4 puntos
- Grave deterioro de la movilidad: 5 - 20 puntos

## **B) ALTERACIONES DE LA FUNCIÓN ARTICULAR**

Mediante la palpación digital, la auscultación y la observación se determinan las alteraciones de la función articular. Se indica al sujeto abrir y cerrar la boca en abertura máxima y se comprueba la existencia de sonido articular unilateral o bilateral, así como la presencia de desviación mandibular en ambos movimientos. Se incorpora la existencia de traba o luxación mandibular, con sonido o sin él, mediante la palpación de la región articular durante los movimientos de apertura y cierre.

Se considera:

**Ruido articular:** Crepitación o chasquido. Se auscultan con ayuda del estetoscopio o por simple audición.

**Traba:** Bloqueo ocasional de corta duración.

**Luxación:** Dislocación del cóndilo con fijación fuera de la cavidad.

Se marca con una X en la casilla correspondiente a Sí en caso afirmativo.

Valoración:

- Apertura y cierre sin desviación mandibular ni sonido (0 punto)
- Sonidos articulares o desviación mandibular durante el movimiento de abertura, o ambas cosas. (1 punto)
- Traba o luxación, con sonido o sin él. (5 puntos)

### **C) DOLOR EN MOVIMIENTO**

Esta manifestación se determina mediante referencias dadas por el sujeto durante el interrogatorio.

- Movimiento mandibular sin dolor: normal
- Dolor referido a un solo movimiento: alteración moderada
- Dolor referido a dos o más movimientos: alteración severa

### **D) DOLOR MUSCULAR**

Estando el sujeto en posición de reposo, se procede a palpar los músculos masticatorios de la siguiente forma:

Se palpan de forma bimanual las fibras anteriores, medias y posteriores del músculo temporal, utilizando para ello los dedos índices, medio, anular y meñique. Haciendo una ligera presión, se coloca el índice en la sien, el dedo mayor en el polo superior de la fosa temporal y el anular por detrás del pabellón de la oreja. La palpación del músculo masetero se realiza bimanualmente. Se coloca el dedo índice de la mano contraria al músculo que se iba a palpar extrabucal e intrabucal y la palpación se efectúa en todo el músculo, de forma ligera en sus inserciones, borde anterior y posterior.

Se colocan los dedos índices inmediatamente por delante de los dedos mayores o del medio, se solicita al sujeto que durante el resto del examen no abra la boca, se presiona firmemente el fascículo profundo de este músculo y luego se corren los dedos hacia el ángulo (fascículo superficial).

Para el músculo pterigoideo medial o interno al ser un músculo elevador se contrae cuando se juntan los dientes; si es el origen del dolor, al apretarlos aumentará el malestar. Cuando se coloca un abate lenguas entre los dientes posteriores y el paciente muerde sobre él, el dolor también aumenta, puesto que los elevadores continúan en contracción. Asimismo, el pterigoideo medial se distiende al abrir mucho la boca. En consecuencia, si es el origen del dolor, la apertura amplia de ésta lo incrementará.

Para las dos porciones del músculo lateral o externo: Pterigoideo lateral inferior: cuando el pterigoideo lateral inferior se contrae, la mandíbula protruye y/o se abre la boca, y la mejor forma de realizar la manipulación funcional es hacer que el paciente realice un

movimiento de protrusión, puesto que este músculo es el principal responsable de esta función. La manipulación más eficaz consiste, pues, en hacer que el paciente lleve a cabo una protrusión en contra de una resistencia creada por el examinador. Si el pterigoideo lateral inferior es el origen del dolor, esta actividad lo incrementará.

Pterigoideo lateral superior: se contrae con los músculos elevadores (temporal, masetero y pterigoideo interno), sobre todo al morder con fuerza. Por tanto, si es el origen del dolor, al apretar los dientes lo incrementará. Se coloca un baja lenguas entre éstos y el paciente muerde, el dolor aumenta de nuevo con la contracción del pterigoideo lateral superior. La distensión del superior se produce en la posición de intercuspidación máxima. En consecuencia, la distensión y la contracción de este músculo se producen durante la misma actividad, al apretar los dientes. Si el músculo superior es el origen del dolor, al apretar los dientes aumentará.

Se solicita al paciente que abra la boca, pero si refiere dolor a la palpación en algunas de las zonas de estos músculos, se determina la sensibilidad:

- De los músculos masticatorios a la palpación/manipulación funcional sin dolor: normal
- De los músculos masticatorios a la palpación/manipulación funcional dolor en 1 a 3 sitios. Alteración moderada
- De los músculos masticatorios a la palpación/manipulación funcional en 4 ó más sitios. Alteración severa

#### E. DOLOR EN LA ARTICULACIÓN TEMPOROMANDIBULAR.

Esta manifestación se detecta mediante el examen clínico o lo referido por el sujeto, o a través de ambos, durante el interrogatorio. Mediante la colocación de los dedos índices por delante del tragus y presión bimanual, se comprueba la presencia o no del dolor a la palpación; posteriormente la presión se realiza con esos mismos dedos introducidos en los conductos auditivos externos.

- Sin dolor espontáneo ni a la palpación: normal
- Dolor a la palpación periauricular unilateral o bilateral de la articulación.  
Alteración moderada
- Dolor a la palpación vía conducto auditivo externo y periauricular. Alteración severa.

De acuerdo con el puntaje del índice la disfunción se clasifica en leve (1-9 puntos), moderada (10-19 puntos) y severa (20-25 puntos)

### **ÍNDICE ANAMNÉSICO DE FONSECA**

El cuestionario propuesto por Fonseca fue entregado y aplicado a los sujetos componentes de la muestra antes de su entrada al consultorio, sin la interferencia del examinador. Se le explicó a cada persona que el cuestionario estaba compuesto por diez preguntas, para las cuales eran posibles las respuestas: A VECES, SÍ y NO, y que para cada pregunta sólo se debería señalar una respuesta.

El cuestionario propuesto por Fonseca permite clasificar si los sujetos son portadores de Trastorno Temporo Mandibular (TTM) leves, moderados o severos, o si no lo son. Para el análisis del cuestionario, serán sumadas las respuestas A VECES, SI y NO de cada sujeto y serán multiplicadas por el valor atribuido a cada respuesta: diez, cinco y cero respectivamente, para luego proceder a clasificarlos según su severidad.

#### **PREGUNTA**

SI (10)

NO (0)

A VECES (5)

¿Tiene dificultad para abrir la boca?

¿Siente dificultad para mover su mandíbula de lado?

¿Tiene cansancio / dolor muscular al masticar?

¿Siente dolores de cabeza con frecuencia?

¿Siente dolor en el cuello o rigidez en el cuello?

¿Tiene dolor de oído o de la región de las articulaciones (ATM)?

¿Ha notado que usted tiene sonidos de ATM al masticar o al abrir la boca?

¿Ha notado si tiene hábitos como el apretar y / o rechinar los dientes (goma de mascar, mordiendo el lápiz o el labio, morderse las uñas)?

¿Siente que sus dientes no encajan bien?

¿Te consideras una persona tensa o nerviosa?

Total de puntos :

INDICE ANAMNESICO/ GRADO DEL TRASTORNO

0 – 15 Sin TMM

20 - 40 leve TMM

45 - 65 Moderado TMM

70 - 100 grave TMM
